# Supplementary material
Source: PubMed Central journal article supplement (PMC4907859)
Supplement: NIHMS773527-supplement-1.pdf [file NIHMS773527-supplement-1.pdf]

# THE LANCET **Oncology**

## **Supplementary appendix**

This appendix formed part of the original submission and has been peer reviewed. We post it as supplied by the authors.

Supplement to: Chow EJ, Stratton KL, Leisenring WM, et al. Pregnancy after chemotherapy in male and female survivors of childhood cancer treated between 1970 and 1999: a report from the Childhood Cancer Survivor Study cohort. *Lancet Oncol* 2016; published online March 22. [http://dx.doi.org/10.1016/S1470-2045\(16\)00086-3](http://dx.doi.org/10.1016/S1470-2045(16)00086-3).

**Pregnancy following chemotherapy among children treated from 1970 through 1999:  
a report from the Childhood Cancer Survivor Study cohort**

**APPENDIX TABLE 1.** Overlap (%) of alkylating and related DNA inter-strand crosslinking agent exposures among the analytic cohort (n=10,938).

| Exposure            | Bu-<br>sulfan | Carmu-<br>stine | Carbo-<br>platin | Cis-<br>platin | Chloram-<br>bucil | Cyclophos-<br>phamide | Dacar-<br>bazine | Ifos-<br>famide | Lomu-<br>stine | Mel-<br>phalan | Nitrogen<br>mustard | Procar-<br>bazine | Temo-<br>zolomide | Thio-<br>tepa |
|---------------------|---------------|-----------------|------------------|----------------|-------------------|-----------------------|------------------|-----------------|----------------|----------------|---------------------|-------------------|-------------------|---------------|
| Busulfan            | -             | 0               | 2<br>(0-0)       | 1<br>(0-0)     | 0                 | 107<br>(1-0)          | 3<br>(0-0)       | 2<br>(0-0)      | 0              | 3<br>(0-0)     | 3<br>(0-0)          | 3<br>(0-0)        | 0                 | 4<br>(0-0)    |
| Carmustine          | -             | -               | 9<br>(0-1)       | 13<br>(0-1)    | 4<br>(0-0)        | 241<br>(2-2)          | 14<br>(0-1)      | 11<br>(0-1)     | 6<br>(0-1)     | 2<br>(0-0)     | 13<br>(0-1)         | 29<br>(0-3)       | 0                 | 0             |
| Carboplatin         | -             | -               | -                | 70<br>(0-6)    | 0                 | 122<br>(1-1)          | 4<br>(0-0)       | 108<br>(1-0)    | 9<br>(0-1)     | 10<br>(0-1)    | 6<br>(0-1)          | 18<br>(0-2)       | 2<br>(0-0)        | 12<br>(0-1)   |
| Cisplatin           | -             | -               | -                | -              | 0                 | 571<br>(5-2)          | 56<br>(0-5)      | 230<br>(2-1)    | 15<br>(0-1)    | 13<br>(0-1)    | 21<br>(0-2)         | 32<br>(0-3)       | 0                 | 10<br>(0-1)   |
| Chlorambucil        | -             | -               | -                | -              | -                 | 3<br>(0-0)            | 2<br>(0-0)       | 0               | 1<br>(0-0)     | 1<br>(0-0)     | 4<br>(0-0)          | 15<br>(0-1)       | 0                 | 1<br>(0-0)    |
| Cyclophosphamide    | -             | -               | -                | -              | -                 | -                     | 170<br>(1-6)     | 338<br>(3-1)    | 44<br>(0-4)    | 75<br>(0-7)    | 69<br>(0-6)         | 421<br>(3-8)      | 1<br>(0-0)        | 34<br>(0-3)   |
| Dacarbazine         | -             | -               | -                | -              | -                 | -                     | -                | 13<br>(0-1)     | 34<br>(0-3)    | 10<br>(0-1)    | 173<br>(1-6)        | 211<br>(1-9)      | 0                 | 0             |
| Ifosfamide          | -             | -               | -                | -              | -                 | -                     | -                | -               | 0              | 13<br>(0-1)    | 7<br>(0-1)          | 10<br>(0-1)       | 0                 | 6<br>(0-1)    |
| Lomustine           | -             | -               | -                | -              | -                 | -                     | -                | -               | -              | 5<br>(0-0)     | 15<br>(0-1)         | 106<br>(1-0)      | 1<br>(0-0)        | 2<br>(0-0)    |
| Melphalan           | -             | -               | -                | -              | -                 | -                     | -                | -               | -              | -              | 7<br>(0-1)          | 8<br>(0-1)        | 0                 | 7<br>(0-1)    |
| Nitrogen<br>mustard | -             | -               | -                | -              | -                 | -                     | -                | -               | -              | -              | -                   | 458<br>(4-2)      | 0                 | 8<br>(0-1)    |
| Procarbazine        | -             | -               | -                | -              | -                 | -                     | -                | -               | -              | -              | -                   | -                 | 1<br>(0-0)        | 12<br>(0-1)   |
| Temozolomide        | -             | -               | -                | -              | -                 | -                     | -                | -               | -              | -              | -                   | -                 | -                 | 0             |
| Thiotepa            | -             | -               | -                | -              | -                 | -                     | -                | -               | -              | -              | -                   | -                 | -                 | -             |

## Pregnancy following chemotherapy among children treated from 1970 through 1999: a report from the Childhood Cancer Survivor Study cohort

**APPENDIX TABLE 2.** Likelihood of reporting first pregnancy and live birth (hazard ratios [HR]) among female childhood cancer survivors not exposed to pelvic or cranial radiotherapy, compared with female siblings, limited to the ages during which participants reported ongoing menses.\*

| Group                                       | Pregnancy        | Live birth           |
|---------------------------------------------|------------------|----------------------|
|                                             | HR (95% CI)      | HR (95% CI)          |
| Female siblings                             | 1.00 (ref)       | 1.00 (ref)           |
| Female survivors, all                       | 0.90 (0.84-0.97) | 0.84 (0.78-0.91)     |
| Ages 15-29 years during follow-up           | 0.96 (0.89-1.04) | 0.89 (0.82-0.98)     |
| Ages 30-44 years during follow-up           | 0.64 (0.53-0.76) | † 0.66 (0.55-0.79) † |
| Not exposed to any alkylator/related agents | 0.93 (0.85-1.01) | 0.87 (0.79-0.96)     |
| Exposed to alkylator/related agents         | 0.90 (0.83-0.98) | 0.85 (0.78-0.94)     |

\*Participants enter the analysis at age 15, cohort entry, or age of menarche (whichever is latest), and exit the analysis at the time of menopause (from any cause), treating menopause as a competing risk event.

†P-value for interaction with age in relation to immediate row above, p<0.0001

## Pregnancy following chemotherapy among children treated from 1970 through 1999: a report from the Childhood Cancer Survivor Study cohort

**APPENDIX TABLE 3.** Likelihood of reporting first pregnancy and live birth (hazard ratios [HR]) among different childhood cancer diagnosis groups not exposed to pelvic or cranial radiotherapy, compared with siblings.\*

| Group                                  | Males              |                    | Females            |                    |
|----------------------------------------|--------------------|--------------------|--------------------|--------------------|
|                                        | Pregnancy          | Live birth         | Pregnancy          | Live birth         |
|                                        | HR (95% CI)        | HR (95% CI)        | HR (95% CI)        | HR (95% CI)        |
| Siblings                               | 1.00 (ref)         | 1.00 (ref)         | 1.00 (ref)         | 1.00 (ref)         |
| Leukemia survivors                     |                    |                    |                    |                    |
| Without alkylating/similar agents      | 0.76 (0.65-0.89) ‡ | 0.73 (0.62-0.87) ‡ | 1.12 (0.99-1.26)   | 1.07 (0.94-1.23)   |
| With alkylating/similar agents         | 0.74 (0.64-0.87) ‡ | 0.77 (0.65-0.91) ‡ | 0.85 (0.75-0.98) † | 0.87 (0.75-1.00)   |
| Central nervous system tumor survivors |                    |                    |                    |                    |
| Without alkylating/similar agents      | 0.54 (0.45-0.64) ‡ | 0.56 (0.46-0.67) ‡ | 0.65 (0.56-0.76) ‡ | 0.61 (0.51-0.72) ‡ |
| With alkylating/similar agents         | 0.62 (0.28-1.38)   | 0.56 (0.23-1.41)   | 0.38 (0.19-0.78) ‡ | 0.48 (0.23-1.03)   |
| Hodgkin lymphoma survivors             |                    |                    |                    |                    |
| Without alkylating/similar agents      | 0.86 (0.68-1.09)   | 0.81 (0.63-1.04)   | 0.97 (0.76-1.23)   | 1.00 (0.78-1.28)   |
| With alkylating/similar agents         | 0.37 (0.31-0.46) ‡ | 0.39 (0.32-0.48) ‡ | 0.81 (0.71-0.94) ‡ | 0.80 (0.69-0.92) ‡ |
| Non-Hodgkin lymphoma survivors         |                    |                    |                    |                    |
| Without alkylating/similar agents      | 1.16 (0.80-1.69)   | 1.22 (0.82-1.80)   | 0.81 (0.44-1.52)   | 0.65 (0.31-1.36)   |
| With alkylating/similar agents         | 0.75 (0.65-0.86) ‡ | 0.77 (0.66-0.89) ‡ | 0.99 (0.84-1.16)   | 0.97 (0.81-1.16)   |
| Kidney tumor survivors                 |                    |                    |                    |                    |
| Without alkylating/similar agents      | 0.92 (0.72-1.17)   | 0.89 (0.69-1.16)   | 0.82 (0.67-1.01)   | 0.82 (0.65-1.03)   |
| With alkylating/similar agents         | 0.45 (0.11-1.80)   | 0.52 (0.13-2.12)   | 0.67 (0.25-1.84)   | 0.61 (0.19-1.94)   |
| Neuroblastoma survivors                |                    |                    |                    |                    |
| Without alkylating/similar agents      | 0.75 (0.55-1.03)   | 0.69 (0.48-0.99) † | 1.01 (0.80-1.28)   | 1.00 (0.77-1.30)   |
| With alkylating/similar agents         | 0.50 (0.34-0.74) ‡ | 0.49 (0.32-0.75) ‡ | 0.81 (0.63-1.05)   | 0.70 (0.52-0.94) † |
| Soft tissue sarcoma survivors          |                    |                    |                    |                    |
| Without alkylating/similar agents      | 0.84 (0.65-1.07)   | 0.92 (0.71-1.18)   | 0.98 (0.78-1.24)   | 0.93 (0.73-1.19)   |
| With alkylating/similar agents         | 0.61 (0.47-0.79) ‡ | 0.62 (0.47-0.81) ‡ | 1.04 (0.84-1.29)   | 1.03 (0.83-1.29)   |
| Bone tumor survivors                   |                    |                    |                    |                    |
| Without alkylating/similar agents      | 0.78 (0.60-1.00)   | 0.77 (0.59-1.01)   | 1.03 (0.83-1.27)   | 0.97 (0.77-1.21)   |
| With alkylating/similar agents         | 0.47 (0.40-0.56) ‡ | 0.47 (0.39-0.55) ‡ | 0.87 (0.77-0.99) † | 0.82 (0.71-0.94) ‡ |

\*Sex-specific models adjusted for race/ethnicity and year of birth.

†P=0.01 to <0.05

‡P<0.01

# Pregnancy following chemotherapy among children treated from 1970 through 1999: a report from the Childhood Cancer Survivor Study cohort

**APPENDIX TABLE 4.** Likelihood of reporting first pregnancy (hazard ratios [HR]) among childhood cancer survivors when adjusted by all 14 alkylating and related DNA inter-strand crosslinking agent exposures, expressed as mg/m<sup>2</sup>.\*

| Exposure                                               | Males            |    | Females          |    |
|--------------------------------------------------------|------------------|----|------------------|----|
|                                                        | HR (95% CI)      |    | HR (95% CI)      |    |
| Busulfan, dose level <sup>†</sup>                      |                  |    |                  |    |
| Lower, <450                                            | 0.45 (0.15-1.41) |    | 0.21 (0.06-0.79) | §  |
| Upper, ≥450                                            | 1.39 (0.77-2.53) |    | 0.14 (0.03-0.55) | ** |
| Carmustine, any vs. none                               | 1.15 (0.88-1.50) |    | 0.84 (0.64-1.11) |    |
| Carboplatin, dose level <sup>†</sup>                   |                  |    |                  |    |
| Lower, <2,112                                          | 1.46 (0.49-4.33) |    | 1.02 (0.52-2.01) |    |
| Middle, 2,112-4,009                                    | 1.78 (1.02-3.11) | §  | 0.86 (0.44-1.68) |    |
| Upper, ≥4,100                                          | 1.41 (0.55-3.64) |    | 0.71 (0.32-1.58) |    |
| Chlorambucil, any vs. none                             | 2.49 (0.59-10.4) |    | 1.11 (0.45-2.74) |    |
| Cisplatin, dose level <sup>†</sup>                     |                  |    |                  |    |
| Lower, <355                                            | 0.85 (0.57-1.26) |    | 1.02 (0.76-1.37) |    |
| Middle, 355-487                                        | 0.75 (0.52-1.08) |    | 1.17 (0.91-1.52) |    |
| Upper, ≥488                                            | 0.56 (0.39-0.82) | ** | 0.94 (0.73-1.22) |    |
| Cyclophosphamide, dose level <sup>†</sup>              |                  |    |                  |    |
| Lower, <3,625                                          | 1.21 (1.06-1.39) | ** | 0.92 (0.82-1.05) |    |
| Middle, 3,625-7,411                                    | 0.89 (0.77-1.03) |    | 1.04 (0.91-1.20) |    |
| Upper, ≥7,412                                          | 0.60 (0.51-0.71) | ** | 0.99 (0.87-1.12) |    |
| Dacarbazine or Temozolomide, any vs. none <sup>‡</sup> | 1.18 (0.91-1.54) |    | 0.89 (0.71-1.11) |    |
| Ifosfamide, dose level <sup>†</sup>                    |                  |    |                  |    |
| Lower, <26,853                                         | 0.88 (0.54-1.44) |    | 0.92 (0.64-1.32) |    |
| Middle, 26,853-52,999                                  | 0.57 (0.34-0.95) | §  | 0.82 (0.57-1.19) |    |
| Upper, ≥53,000                                         | 0.41 (0.22-0.77) | ** | 1.05 (0.74-1.49) |    |
| Lomustine, dose level <sup>†</sup>                     |                  |    |                  |    |
| Lower, <411                                            | 1.03 (0.52-2.04) |    | 0.92 (0.48-1.74) |    |
| Upper, ≥411                                            | 0.73 (0.23-2.34) |    | 0.42 (0.17-1.03) |    |
| Melphalan, any vs. none                                | 1.25 (0.72-2.18) |    | 1.24 (0.83-1.87) |    |
| Nitrogen mustard, dose level <sup>†</sup>              |                  |    |                  |    |
| Lower, <36                                             | 1.05 (0.62-1.77) |    | 1.06 (0.71-1.58) |    |
| Middle, 36-56                                          | 0.76 (0.40-1.46) |    | 1.20 (0.81-1.77) |    |
| Upper, ≥57                                             | 0.75 (0.40-1.43) |    | 0.87 (0.53-1.41) |    |
| Procarbazine, dose level <sup>†</sup>                  |                  |    |                  |    |
| Lower, <3,352                                          | 0.68 (0.45-1.04) |    | 0.95 (0.69-1.29) |    |
| Middle, 3,352-5,059                                    | 0.42 (0.25-0.71) | ** | 0.91 (0.67-1.23) |    |
| Upper, ≥5,060                                          | 0.41 (0.24-0.69) | ** | 0.90 (0.61-1.32) |    |
| Thiotepa, any vs. none                                 | 0.44 (0.11-1.75) |    | 0.96 (0.30-3.07) |    |

\*Adjusted for all agents listed below plus age at diagnosis and race/ethnicity.

<sup>†</sup>None as referent group; levels (mg/m<sup>2</sup>) among exposed based on tertiles, or if sample size was limited, the median.

<sup>‡</sup>Dacarbazine doses only available for survivors diagnosed 1987-1999 (n=219 exposed); in subanalyses with those survivors, no association seen with dacarbazine dose levels; only 3 survivors exposed to temozolomide.

§P=0.01 to <0.05

\*\*P<0.01

**Pregnancy following chemotherapy among children treated from 1970 through 1999:  
a report from the Childhood Cancer Survivor Study cohort**

**APPENDIX TABLE 5.** Association between age at initial cancer diagnosis and subsequent likelihoods (hazard ratios [HR]) of reporting pregnancy and live birth.\*

| Age at diagnosis | Pregnancy        | Live birth       |
|------------------|------------------|------------------|
|                  | HR (95% CI)      | HR (95% CI)      |
| Males, years     |                  |                  |
| 15-20            | 1.00 (ref)       | 1.00 (ref)       |
| 10-14            | 0.88 (0.76-1.01) | 0.86 (0.74-1.00) |
| 5-9              | 0.94 (0.81-1.09) | 0.90 (0.76-1.05) |
| <5               | 0.94 (0.80-1.10) | 0.87 (0.74-1.03) |
| Females, years   |                  |                  |
| 15-20            | 1.00 (ref)       | 1.00 (ref)       |
| 10-14            | 1.11 (0.98-1.26) | 1.13 (0.99-1.29) |
| 5-9              | 1.01 (0.87-1.16) | 1.11 (0.96-1.29) |
| <5               | 0.92 (0.80-1.06) | 0.96 (0.83-1.11) |

\* Estimates derived from Model 1 in Table 4 with concurrent adjustment for individual chemotherapy agent doses and race/ethnicity.
